# Supplementary material
Source: PubMed Central journal article supplement (PMC7541638)
Supplement: NIHMS1618244-supplement-1.pdf [file NIHMS1618244-supplement-1.pdf]

## SUPPLEMENTARY FIGURE LEGENDS

**Supplementary Figure 1.** (A) HCC827 TKI resistant cells, ERC4 cells, up-regulate mesenchymal markers including N-cadherin and vimentin while TKI-sensitive HCC827 cells maintain epithelial markers, E-cadherin. CDH1: E-cadherin, CDH2: N-cadherin, VIM: vimentin, ACTB:  $\beta$ -actin. A representative immunoblot from 3 independent experiments. (B) Representative IHC analyses from HCC827 and ERC4 tumors using E-cadherin, CD44, N-cadherin and vimentin antibodies. Scale 100  $\mu$ M. Table: Table: Scoring by board-certified pathologists, -, negative; +, weak; ++, moderate; +++, strong.

**Supplementary Figure 2.** (A) A heatmap showing angiogenic factor and growth factor secretion from epithelial (HCC4006, HCC827) and mesenchymal (HCC4006Ge-R, HCC4006O-R and ERC4) cell lines. MFIs from Luminex multiplex assay analysis were  $\log_2$  transformed and the differences in expression are displayed for each analyte independently. (B) HCC4006Ge-R cells show up-regulation of mesenchymal markers, N-cadherin and vimentin. CDH1: E-cadherin, CDH2: N-cadherin, VIM: vimentin, ACTB:  $\beta$ -actin. A representative immunoblot from 3 independent experiments. (C) HCC4006O-R cells also show up-regulation of mesenchymal markers, N-cadherin and vimentin. CDH1: E-cadherin, CDH2: N-cadherin, VIM: vimentin, ACTB:  $\beta$ -actin. A representative immunoblot from 3 independent experiments. (D) HCC827 with stable knockdown of E-cadherin ( $\Delta$ CDH1) up-regulate mesenchymal markers N-cadherin and vimentin compared to control ( $\Delta$ NT). CDH1: E-cadherin, CDH2: N-cadherin, VIM: vimentin, ACTB:  $\beta$ -actin. A representative immunoblot from 3 independent experiments. (E) VEGF-A and

EDN1 secretion normalized with protein concentration. Error bars: S.D. t-test \*\*\*  $p < 0.001$ , \*\*\*\*  $p < 0.0001$ . (F) VEGF-A and EDN1 secretion normalized with protein concentration. Error bars: S.D. t-test \*\*\*  $p < 0.001$ , \*\*\*\*  $p < 0.0001$ . (G) VEGF-A and EDN1 secretion normalized with cell count in HCC827 and ERC4 cells under hypoxic conditions (1%O<sub>2</sub>) for 72 hours. Error bars: S.D. t-test \*\*  $p < 0.01$  \*\*\*  $p < 0.001$ , \*\*\*\*  $p < 0.0001$ . (H) VEGF-A and EDN1 secretion normalized with cell count. The indicated cells were grown in normoxic or hypoxic conditions and treated with vehicle or gefitinib for 72 hours (100 nmol/L). Error bars: S.D. t-test \*\*\*\*  $p < 0.0001$ .

**Supplementary Figure 3.** (A) Colorimetric *in vitro* proliferation assay for 72 hours with gefitinib of HCC827 EDN1 overexpressing cells. N=3. Error bars: S.D. (B) EDN1 secretion from HCC827Flag-V5 and HCC827EDN1-V5 cell xenografts following 6 days of vehicle or gefitinib (50 mg/kg) treatment normalized with protein concentration. Error bars: S.D. One-way ANOVA. N.S. Not significant, \*\*  $p < 0.01$ , \*\*\*\*  $p < 0.0001$ . (C) Mass spectrometry-based quantification of gefitinib in HCC827Flag-V5 and HCC827EDN1-V5 cell xenografts, normalized with total protein. The tumor bearing mice were treated with gefitinib (20 mg/kg) for 1 hour prior to sacrifice and harvesting tumors. Error bars: S.D. t-test. \*\*\*  $p < 0.001$ . (D) Residual tumor (%) after 4 weeks of growth and 6 days of gefitinib treatment. Error bars: S.D. t-test \* $p < 0.05$ . (E) Exposure of HCC827 cells for 72 hours to rEDN1 does not decrease epithelial marker, CDH1 and does not increase the expression of mesenchymal markers, CDH2 and VIM. CDH1: E-cadherin, CDH2: N-cadherin, VIM: vimentin, ACTB:  $\beta$ -actin. A representative immunoblot from 3 independent experiments.

(F) Colorimetric *in vitro* proliferation assay for 72 hours with osimertinib in the absence (HCC827) or presence of rEDN1 (100 nmol/L, HCC827+rEDN1). N=3. Error bars: S.D.

(G) Colorimetric *in vitro* proliferation assay for 72 hours with gefitinib of HCC4006Ge-R EDN1 repressing cells. N=3. Error bars: S.D. (H) Canonical epithelial and mesenchymal markers of HCC827 EDN1-V5 overexpressing cells and HCC4006Ge-R EDN1 repressing cells. A representative immunoblot from 3 independent experiments.

**Supplementary Figure 4.** (A) (Left) Relative blood flow in the tumors captured using a Laser Doppler flowmeter. Error bars: S.D. t-test. \*\*  $p < 0,01$ . (Center) Microvessel density of CD31 stained sections of HCC827 and ERC4 xenografts. (Right) Representative IHC analyses from HCC827 and ERC4 tumor xenografts using anti-ACTA2 ( $\alpha$ SMA) antibody. Scale 100  $\mu$ M. (B) Mass spectrometry-based quantification of gefitinib in HCC827 and ERC4 tumor xenografts normalized with total protein. The tumor bearing mice were treated with gefitinib (20 mg/kg) for 1 hour prior to sacrifice and harvesting tumors. Error bars: S.D. t-test. \*\*\*\*  $p < 0,0001$ . (C)  $5 \times 10^6$  of the HCC4006 cells were grafted on flanks of mice and allowed to grow for 14 days prior to treatments with vehicle, gefitinib (20 mg/kg), bosentan (200 mg/kg) or combination treatment. Tumor volumes were measured weekly. Error bars: S.D. t-test. \*  $p < 0,05$ . (D) Body weight (gr) of the mice was measured weekly. (E) EDN1 secretion from the HCC4006 tumor xenografts treated with vehicle or gefitinib (20 mg/kg) was quantified normalized with total protein. Error bars: SEM. t-test. \*  $p < 0,05$ . (F) The quantification of allelic prevalence of EGFR T790M vs. total EGFR in tumors from vehicle, gefitinib and gefitinib and bosentan groups, using ddPCR. Error bars: SD. One-way ANOVA. N.S. Not significant. (G) Tumors from vehicle, acute gefitinib (1-hour

treatment), chronic gefitinib and chronic gefitinib and bosentan treated mice were homogenized and pEGFR (Y1068), tEGFR and vinculin were analyzed in the lysates.

**Supplemental Figure 5.** (A) Graphical summary depicting the impact of EDN1 secretion from tumors on blood vessels and rationale for EDNR antagonist and TKI combination therapy.
