# Supplementary material
Source: PubMed Central journal article supplement (PMC7541638)

# SUPPLEMENTARY FIGURE 1

**A**

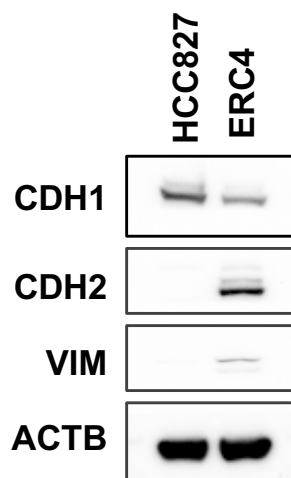

**B**

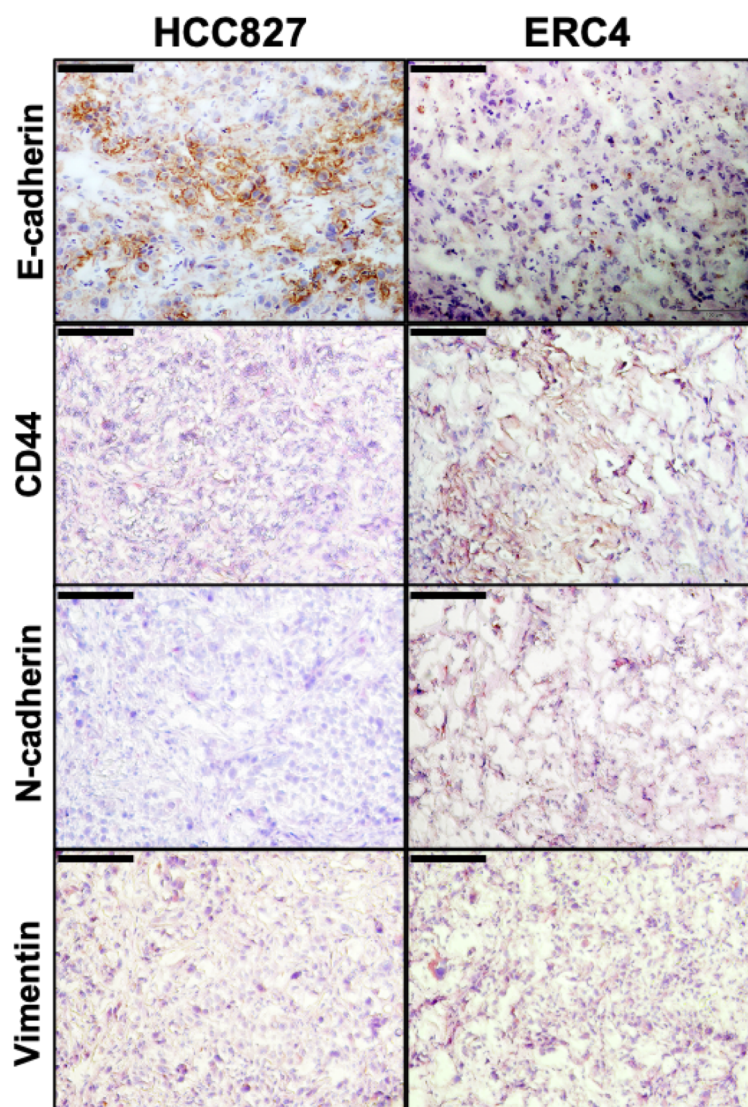

|            | HCC827 | ERC4 |
|------------|--------|------|
| E-cadherin | +++    | +    |
| CD44       | -      | ++   |
| N-cadherin | -      | +    |
| Vimentin   | -      | +    |



# SUPPLEMENTARY FIGURE 3

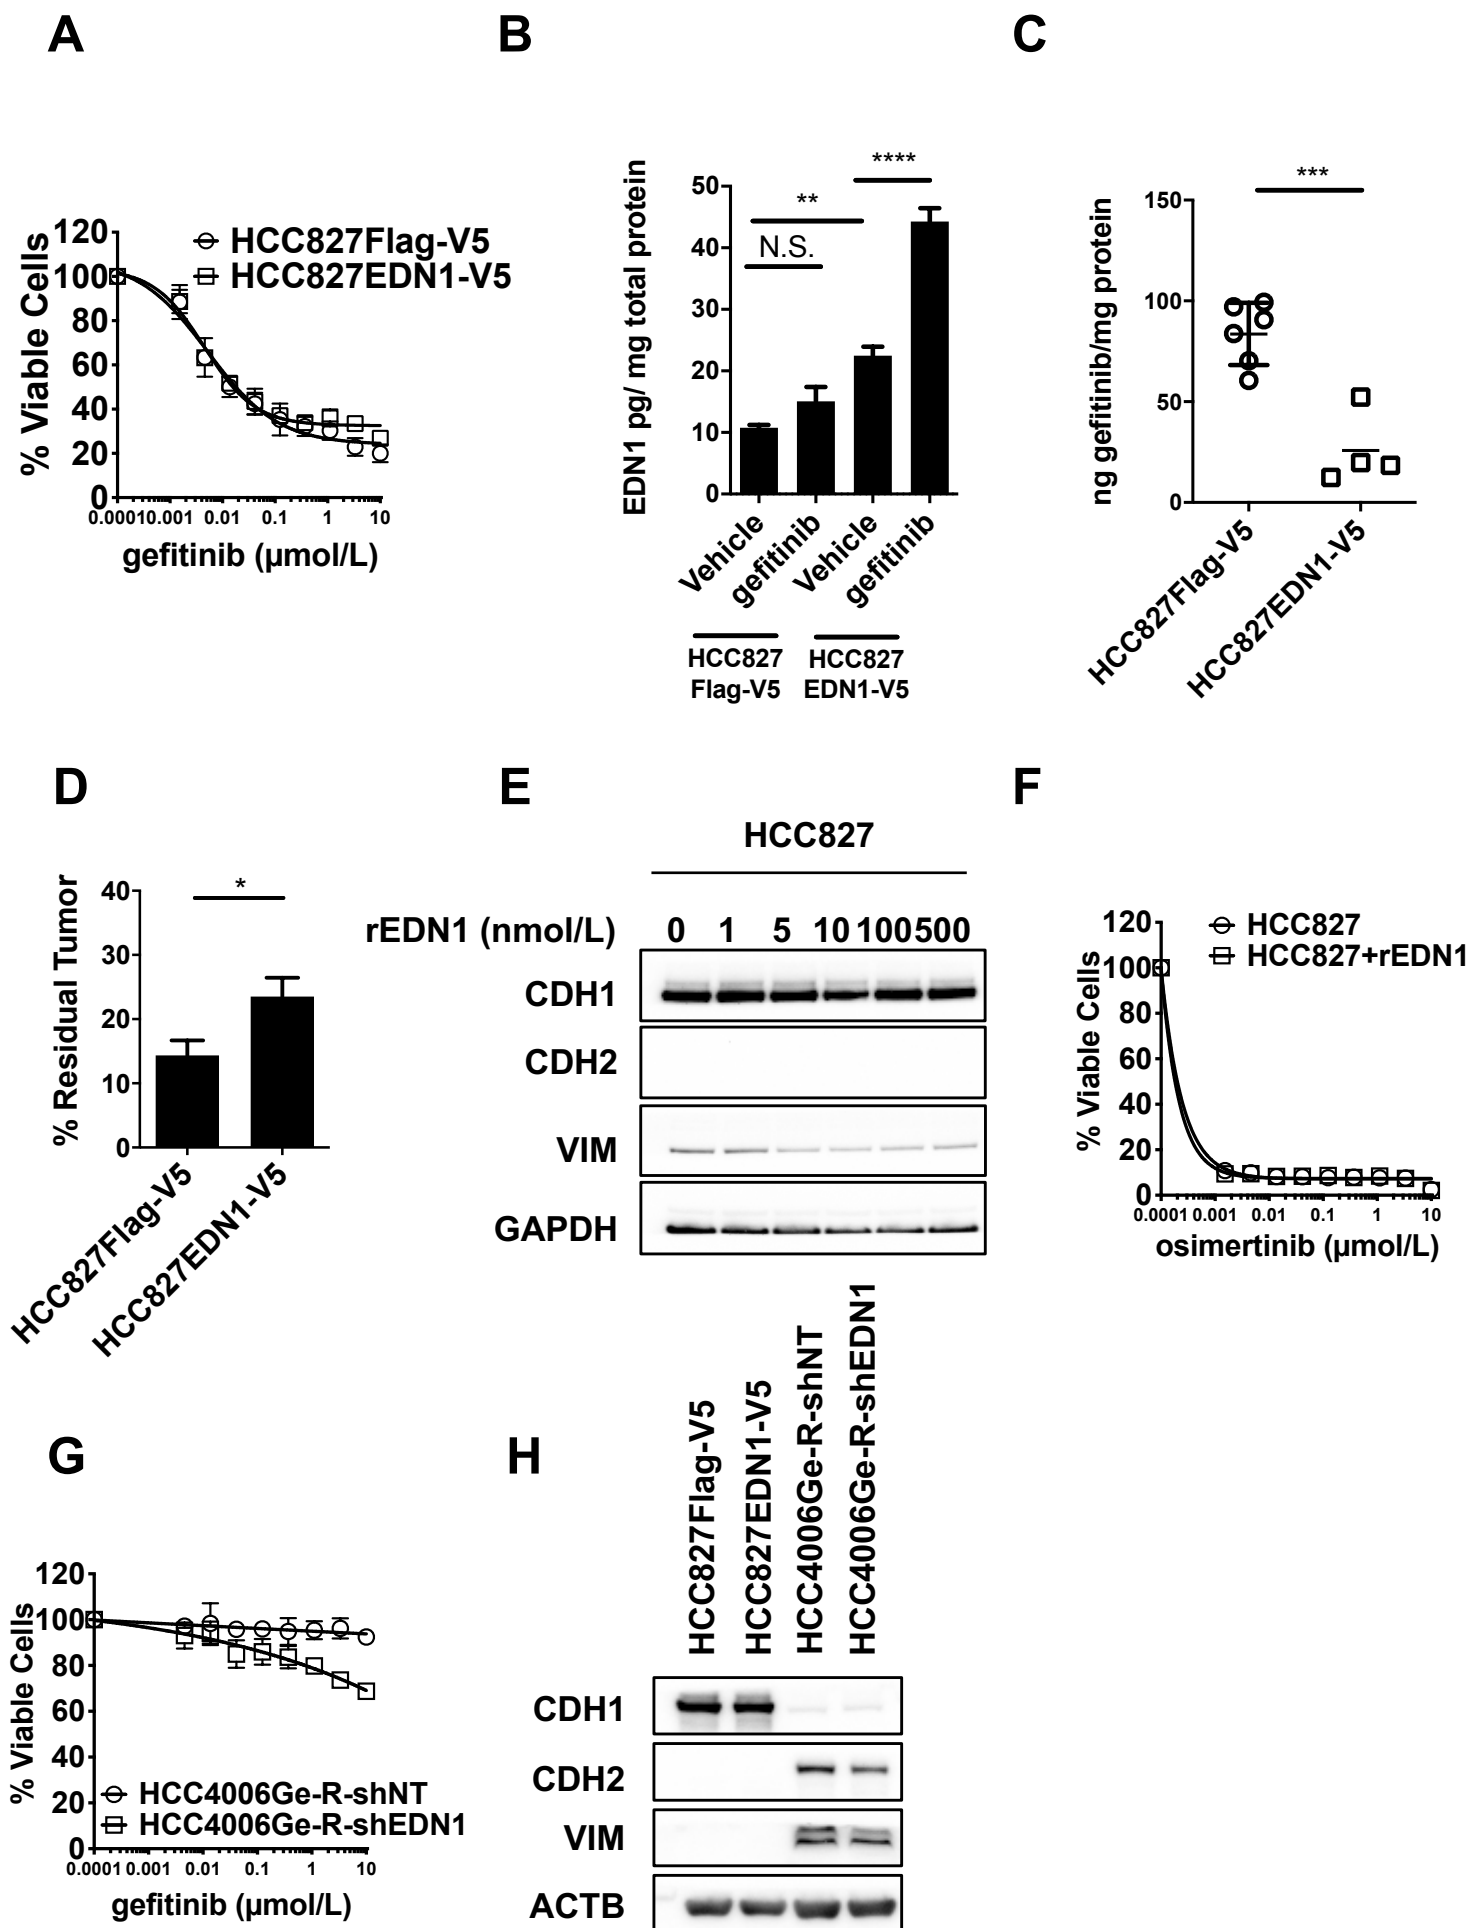

# SUPPLEMENTARY FIGURE 4

**A**

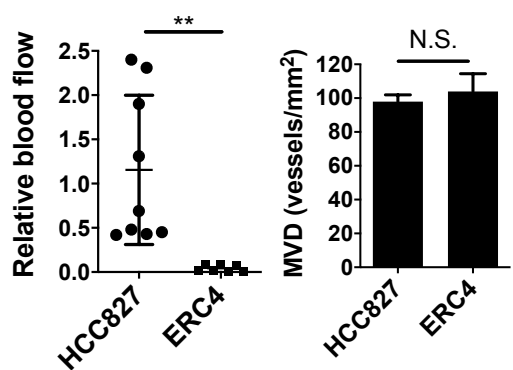

**B**

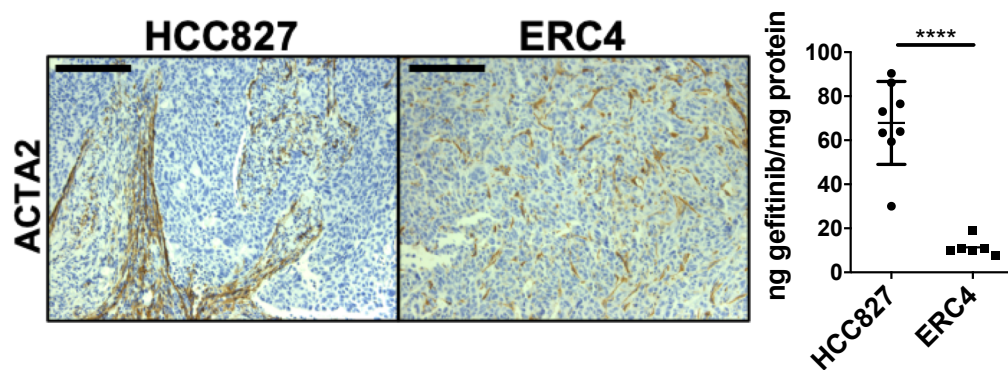

**C**

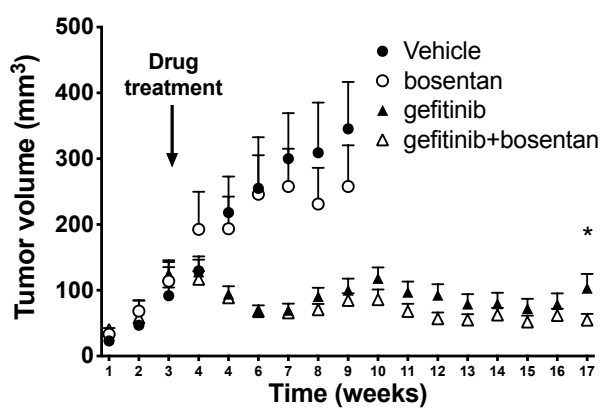

**D**

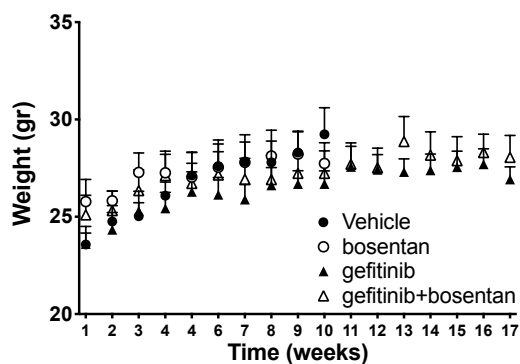

**E**

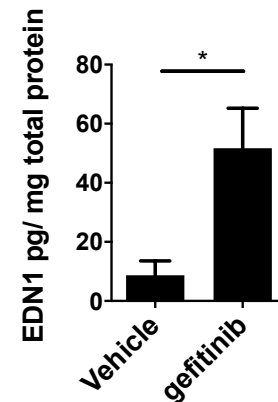

**F**

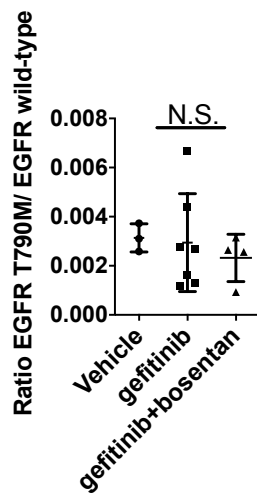

**G**

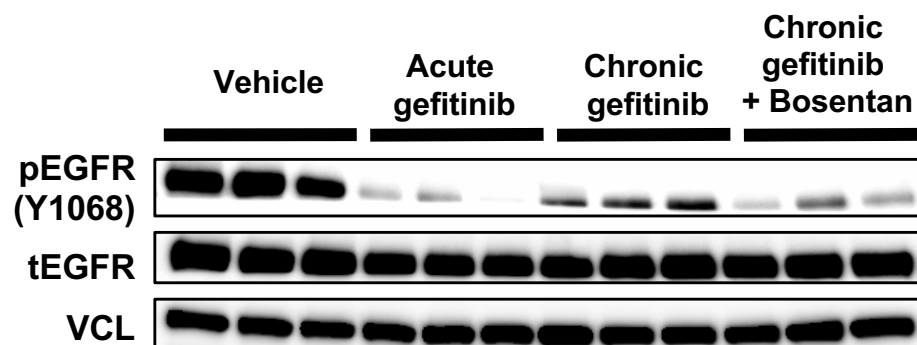

# SUPPLEMENTARY FIGURE 5

A

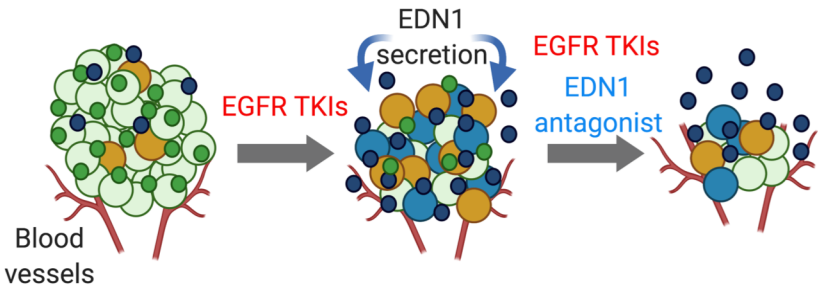

- Epithelial tumors
- Drug tolerant tumors
- Mesenchymal tumors
- VEGF-A
- Endothelin-1 (EDN1)

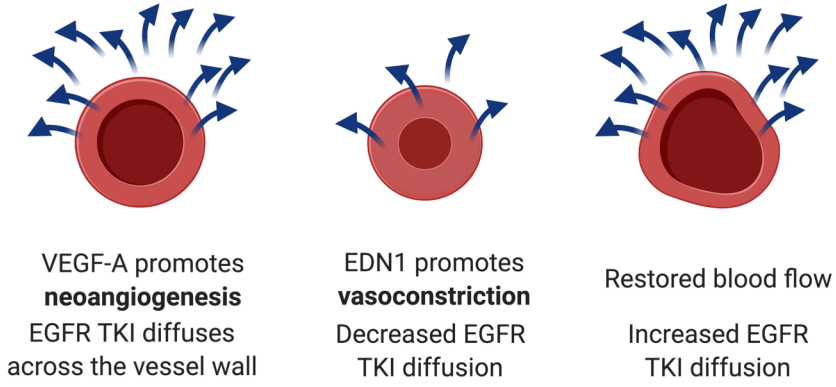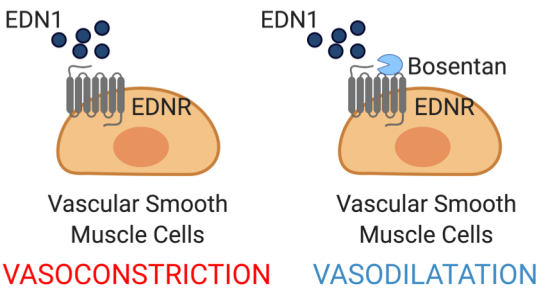

Supplement: NIHMS1618244-supplement-2.pdf [file NIHMS1618244-supplement-2.pdf]
